# Supplementary material
Source: PubMed Central journal article supplement (PMC3325153)
Supplement: NIHMS364691-supplement-02.pdf [file NIHMS364691-supplement-02.pdf]

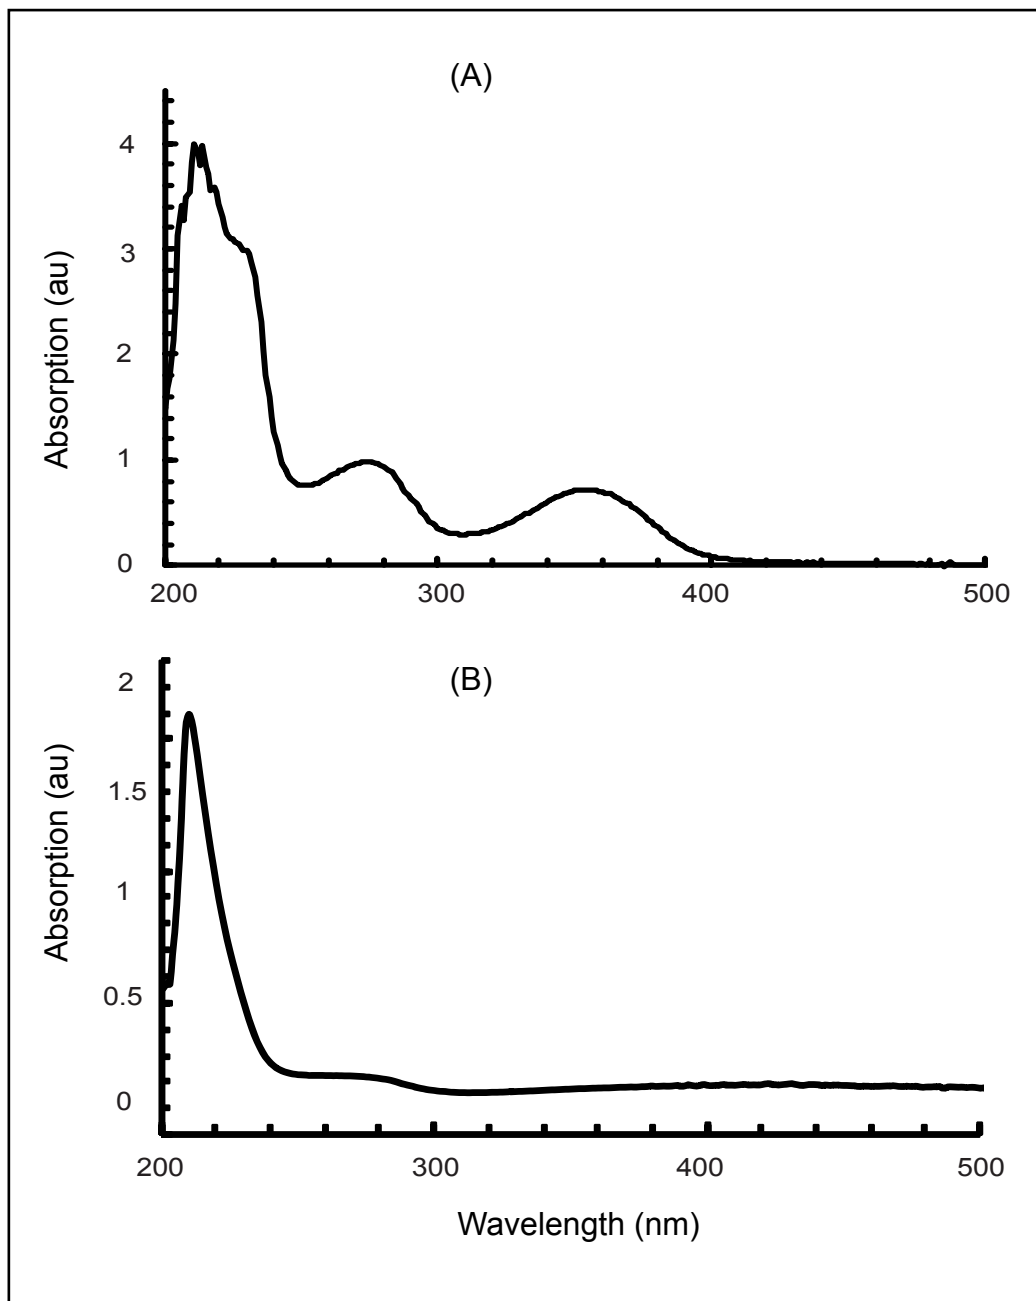

Figure S1. Biotinylation of BChE antibodies. A, UV-absorption spectrum showing conjugation of biotin with polyclonal anti-BChE antibodies. B, UV absorption measurement in the supernatant after pulling down the biotin/streptavidin magnetic bead complex. The disappearance of the peaks at 280/354 nm indicates a complete complex formation.
